# Supplementary material for: Influence of lipid oxidation on the digestive efficiency of Antarctic krill oil: insights from a simulated gastrointestinal digestion model
Source: Royal Society of Chemistry journal article supplement (doi:10.1039/d4fo02659d), 2024-01-01
Supplement: d4fo02659d1.pdf [file d4fo02659d1.pdf]

## Supporting information

### **Influence of lipid oxidation on the digestive efficiency of Antarctic krill oil: insights from a simulated gastrointestinal digestion model**

Ruiying Wang<sup>a</sup>, Xin Sun<sup>a</sup>, Guimei Dong<sup>a</sup>, Chao Guo<sup>a</sup>, Fawen Yin<sup>a</sup>, Huilin Liu<sup>a</sup>, Liang Song<sup>a</sup>, Dayong Zhou<sup>a,\*</sup>

*<sup>a</sup>State Key Laboratory of Marine Food Processing & Safety Control, National Engineering Research Center of Seafood, Collaborative Innovation Center of Seafood Deep Processing, School of Food Science and Technology, Dalian Polytechnic University, Dalian, PR China, 116034*

\*Corresponding author (E-mail: [zdyzfl@163.com](mailto:zdyzfl@163.com); Fax: +86-411-86323262; Tel: +86-411-86323453). Qinggongyuan 1, Ganjingzi district, Dalian, P. R. China, 116034

Table S1. Solutions of digestion fluids diluted with water (1.25× concentrations).

| Solution added                                    | Final concentration in SGF<br>(mM) | Final concentration in SIF<br>(mM) |
|---------------------------------------------------|------------------------------------|------------------------------------|
| KCl                                               | 6.9                                | 6.8                                |
| KH <sub>2</sub> PO <sub>4</sub>                   | 0.9                                | 0.8                                |
| NaHCO <sub>3</sub>                                | 25                                 | 85                                 |
| NaCl                                              | 47.2                               | 38.4                               |
| MgCl <sub>2</sub> (H <sub>2</sub> O) <sub>6</sub> | 0.12                               | 0.33                               |
| (NH <sub>4</sub> ) <sub>2</sub> CO <sub>3</sub>   | 0.5                                | -                                  |
| HCl                                               | 15.6                               | 8.4                                |
| CaCl <sub>2</sub> (H <sub>2</sub> O) <sub>2</sub> | 0.15                               | 0.6                                |
| Pepsin                                            | 2000 U/mL                          | -                                  |
| Gastric lipase                                    | 60 U/mL                            | -                                  |
| Pancreatin                                        | -                                  | 2000 U/mL                          |
| Bile salts                                        | -                                  | 10                                 |
| Phospholipase A <sub>2</sub>                      | -                                  | 5 U/mL                             |

Table S2 Free fatty acid content (g/100 g) of lipids extracted from the digestive fluids

|            | Fresh      | Oxidized   | F-SI        | O-SI        | F-SI-TPP    | O-SI-TPP    |
|------------|------------|------------|-------------|-------------|-------------|-------------|
| C14:0      | 0.13±0.01f | 0.16±0.01e | 2.66±0.01a  | 2.11±0.01c  | 2.21±0.01b  | 1.37±0.01d  |
| C16:0      | 0.44±0.03e | 0.52±0.04d | 5.26±0.05a  | 4.24±0.03b  | 4.29±0.02b  | 2.68±0.01c  |
| C16:1      | 0.08±0.00e | 0.10±0.00e | 2.14±0.01a  | 1.74±0.01c  | 1.82±0.02b  | 1.31±0.01d  |
| C17:0      | 0.01±0.00e | 0.02±0.00e | 0.33±0.00a  | 0.28±0.00c  | 0.28±0.00b  | 0.19±0.01d  |
| C18:0      | 0.01±0.00f | 0.02±0.00e | 0.38±0.00a  | 0.31±0.00c  | 0.35±0.00b  | 0.21±0.00d  |
| C18:1 n-9c | 0.14±0.00f | 0.17±0.02e | 3.21±0.02a  | 2.61±0.01c  | 2.66±0.01b  | 1.90±0.01d  |
| C18:2 n-6t | 0.13±0.01f | 0.15±0.01e | 1.71±0.01a  | 1.35±0.01c  | 1.44±0.00b  | 1.01±0.01d  |
| C18:2 n-6c | 0.07±0.00e | 0.07±0.00e | 0.62±0.00a  | 0.48±0.00c  | 0.50±0.00b  | 0.36±0.00d  |
| C18:3 n-3  | 0.18±0.01e | 0.25±0.02c | 0.33±0.02a  | 0.28±0.00b  | 0.29±0.00b  | 0.23±0.04d  |
| C20:0      | 0.06±0.00f | 0.07±0.00e | 0.92±0.01a  | 0.77±0.00c  | 0.81±0.00b  | 0.52±0.00d  |
| C20:1      | 0.02±0.00e | 0.02±0.00e | 0.45±0.00a  | 0.33±0.01c  | 0.37±0.00b  | 0.22±0.00d  |
| C20:5 n-3  | 0.58±0.04e | 0.66±0.06e | 6.45±0.10a  | 5.32±0.03c  | 5.44±0.02b  | 3.60±0.01d  |
| C22:6 n-3  | 0.56±0.04e | 0.62±0.05e | 4.96±0.08a  | 3.96±0.02c  | 4.15±0.01b  | 2.74±0.00d  |
| SUM        | 2.40±0.16f | 2.82±0.23e | 29.42±0.57a | 23.78±0.11c | 24.61±0.10b | 16.35±0.07d |

a–f Differences in the experimental data of free fatty acids in the same row ( $p < 0.5$ ). F and O mean fresh and oxidized AKO, respectively. SI means simulated intestinal digestion. TPP means tea polyphenol palmitate. SUM means total free fatty acid content.

Table S3 Fatty acid content (g/100 g) of lipids before the SGID

|          | Fatty acid content (g/100g) |
|----------|-----------------------------|
| Fresh    | 89.83±0.48                  |
| Oxidized | 83.42±0.17                  |
